# Supplementary material
Source: PubMed Central journal article supplement (PMC3406159)
Supplement: AEM.00733-12_zam999103515so1.pdf [file AEM.00733-12_zam999103515so1.pdf]

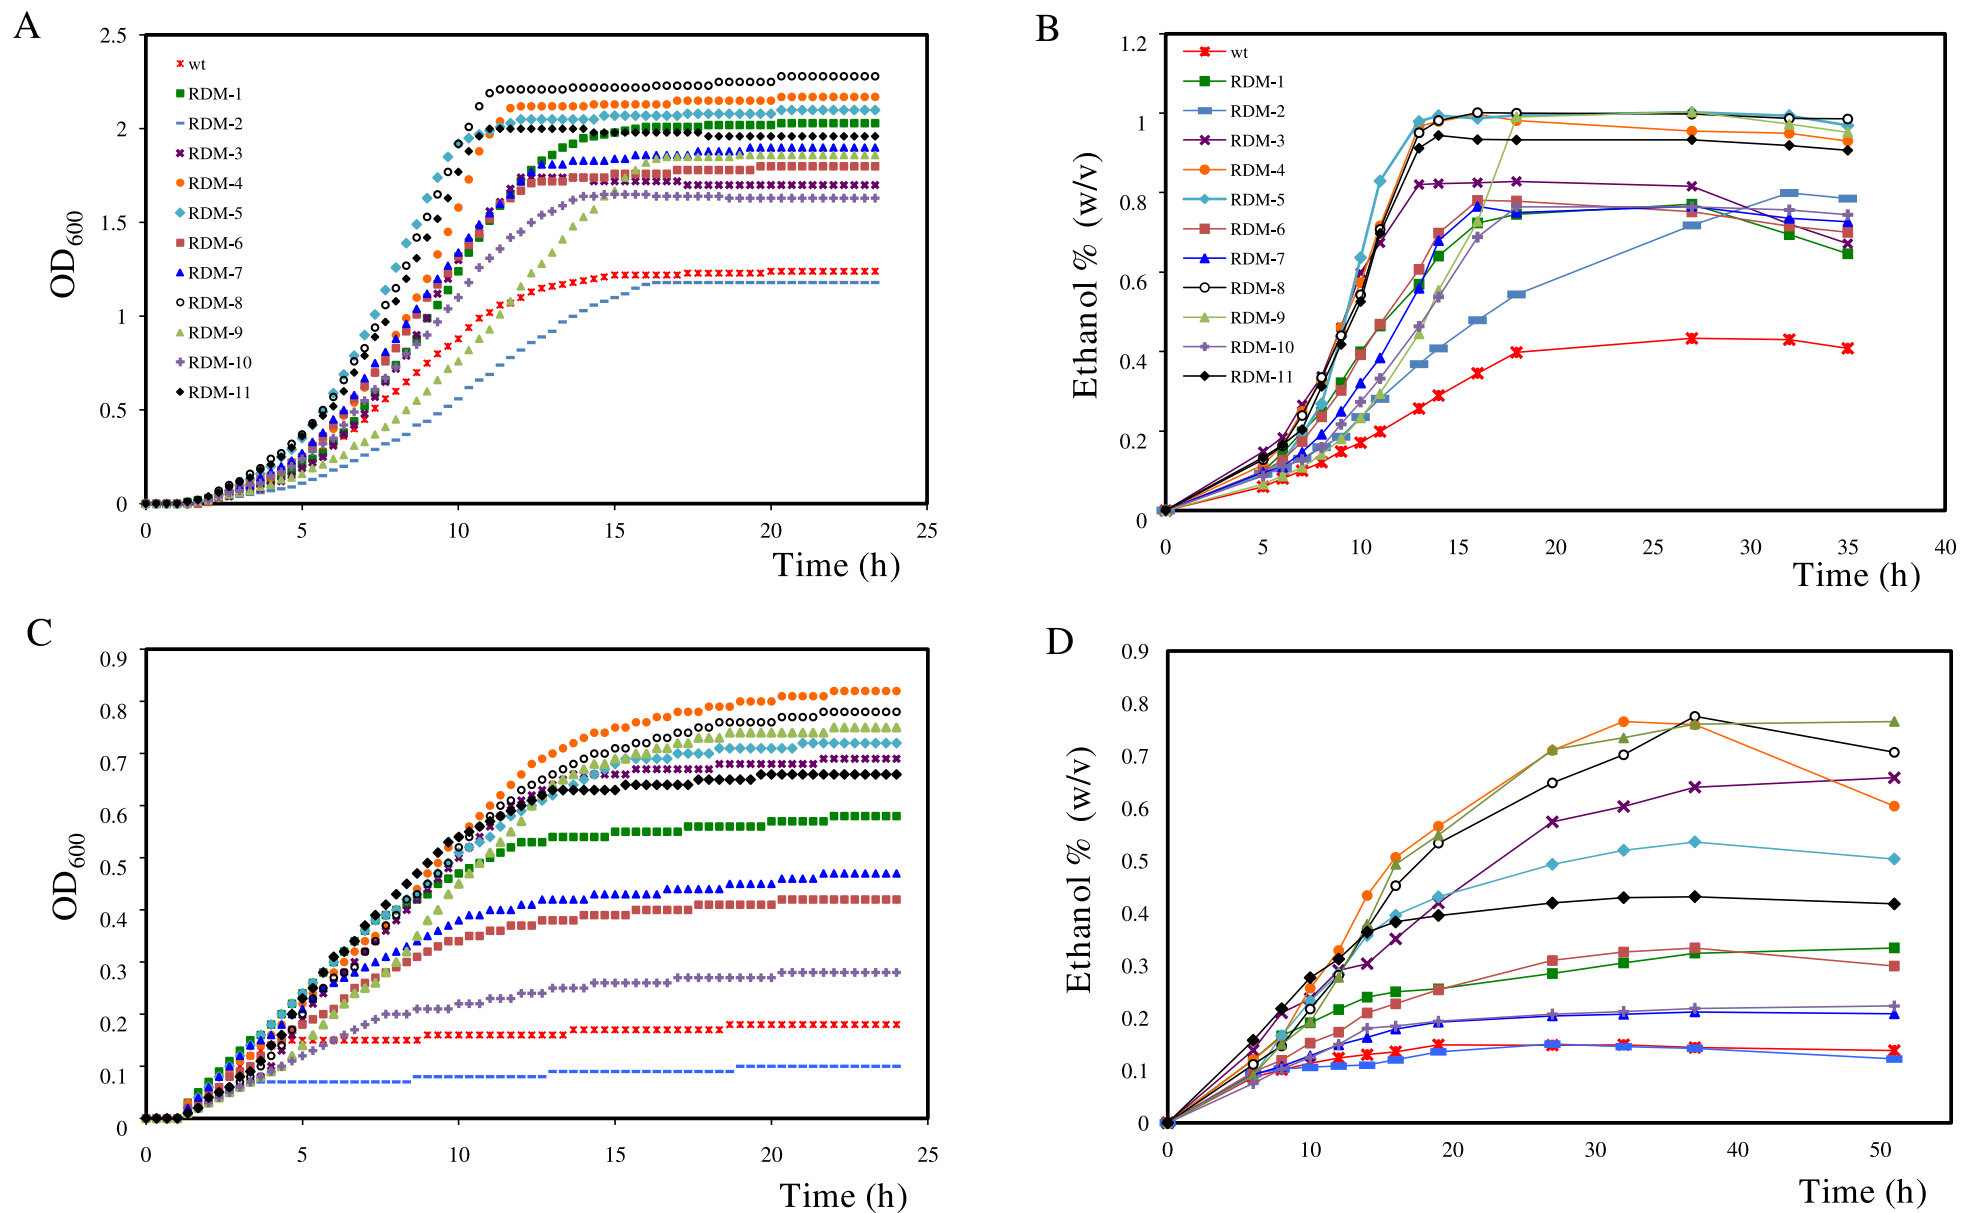

Fig. S1. Growth and ethanol production of the wt and RDM strains under aerobic plus high temperature conditions. Cell growth (A) and ethanol production (B) at 30 °C with shaking at 200 rpm, and cell growth (C) and ethanol production (D) at 39 °C with shaking at 200 rpm. The cell growths were performed more than three times for each strain, with less than 10% difference in measurement. The productions were averaged for three times.
