# Supplementary material
Source: PubMed Central journal article supplement (PMC3406159)
Supplement: AEM.00733-12_zam999103515so2.pdf [file AEM.00733-12_zam999103515so2.pdf]

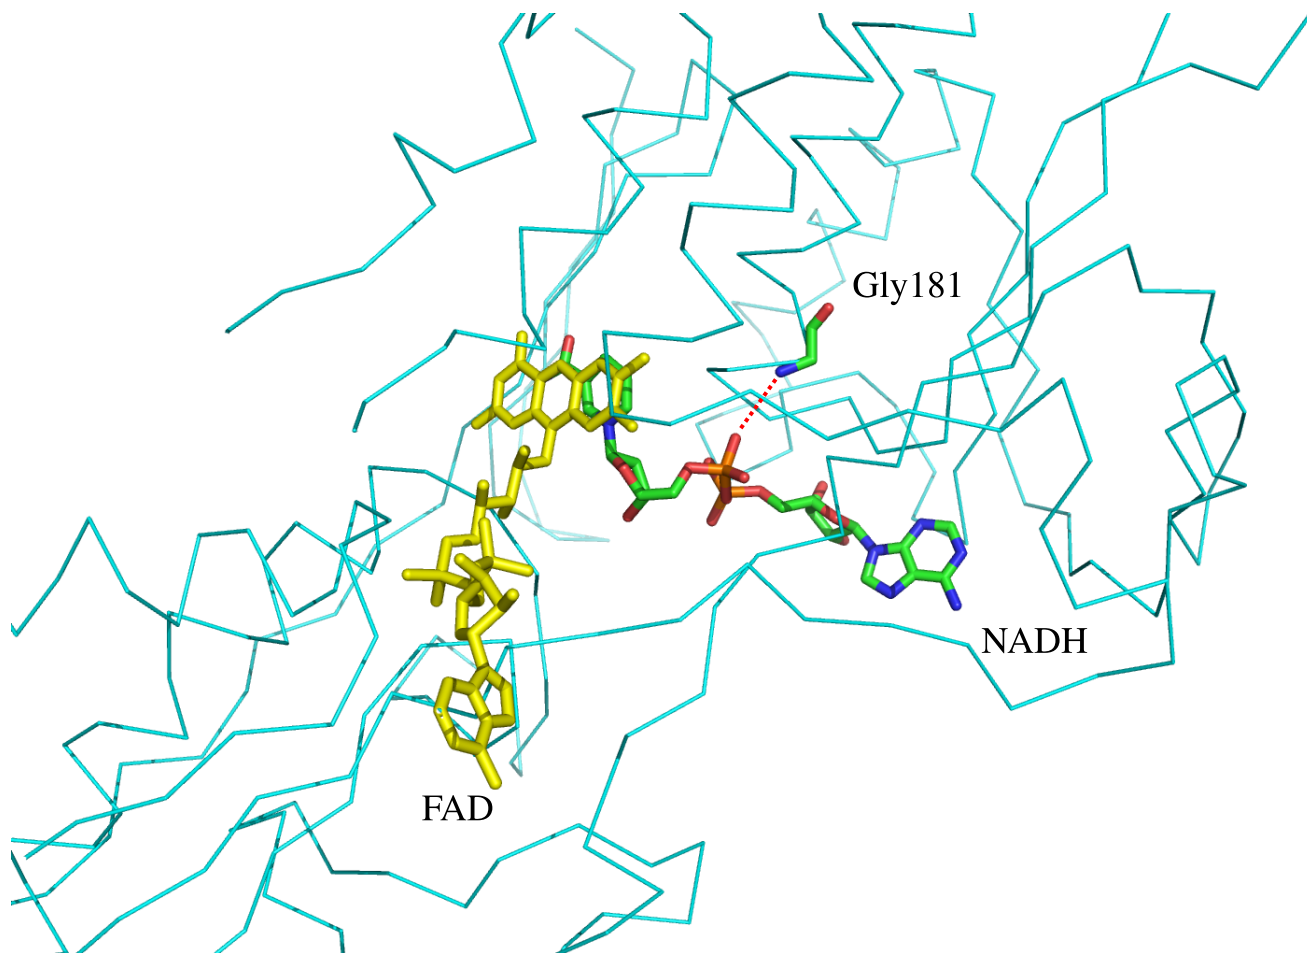

Fig. S2. Ribbon representation of *Escherichia coli* NADH dehydrogenase (PDB ID: 1OZK). FAD is colored in yellow. Carbon, oxygen, nitrogen, and phosphorus elements of NADH and Gly181 are colored in green, red, blue, and orange, respectively. NO1 oxygen of NADH and the nitrogen of the main chain of Gly181 for NADH dehydrogenase is connected by a dashed line. The structural figures were generated using PyMOL (DeLano Scientific LLC).
