# Supplementary material
Source: PubMed Central journal article supplement (PMC3406159)
Supplement: AEM.00733-12_zam999103515so3.pdf [file AEM.00733-12_zam999103515so3.pdf]

## Supplemental Material

Table S1. Biomass of wt and RDM strains cultivated under aerobic and aerobic plus high temperature conditions.

|        | $Y_{X/S}$ [g dry weight (mol glucose) <sup>-1</sup> ] |                               |
|--------|-------------------------------------------------------|-------------------------------|
|        | Aerobic                                               | Aerobic plus high temperature |
| wt     | 4.609 (± 0.790)                                       | 0.427 (± 0.109)               |
| RDM-1  | 5.902 (± 0.600)                                       | 1.876 (± 0.274)               |
| RDM-2  | 4.740 (± 0.685)                                       | 0.359 (± 0.080)               |
| RDM-3  | 5.641 (± 0.486)                                       | 2.092 (± 0.188)               |
| RDM-4  | 7.217 (± 1.134)                                       | 2.645 (± 0.302)               |
| RDM-5  | 6.541 (± 0.732)                                       | 2.242 (± 0.189)               |
| RDM-6  | 5.732 (± 0.492)                                       | 1.213 (± 0.205)               |
| RDM-7  | 5.869 (± 0.486)                                       | 1.295 (± 0.159)               |
| RDM-8  | 7.250 (± 1.093)                                       | 2.616 (± 0.153)               |
| RDM-9  | 6.135 (± 0.793)                                       | 2.541 (± 0.187)               |
| RDM-10 | 5.294 (± 0.629)                                       | 1.007 (± 0.132)               |
| RDM-11 | 6.667 (± 0.450)                                       | 2.121 (± 0.130)               |

$Y_{X/S}$ : g dry weight per mole glucose consumed.

Data are means ± SEM.
