# Supplementary material
Source: PubMed Central journal article supplement (PMC3406159)
Supplement: AEM.00733-12_zam999103515so4.pdf [file AEM.00733-12_zam999103515so4.pdf]

## Supplemental Material

Table S2. Oligonucleotides used for PCR amplification of respiratory chain–enzyme genes.

| Gene                                                   | Forward primer sequence             | Reverse primer sequence               | Product size (bp) |
|--------------------------------------------------------|-------------------------------------|---------------------------------------|-------------------|
| Complementary experiments                              |                                     |                                       |                   |
| <i>ndh</i>                                             | CCCGTCCTGTGGATCATTATTAGGATCGTTTGGTA | AAGGGCATCGGTTCGAAGTTGGATAATAATATCAA   | 3963              |
| <i>cydAB</i>                                           | CCCGTCCTGTGGATCATCGGTCTGTAAACCAACGA | AAGGGCATCGGTTCGAAGTAGGCTGATTACGCAATT  | 5265              |
| <i>ccp</i>                                             | CCCGTCCTGTGGATCATATGCTCATTGCTACACTG | AAGGGCATCGGTTCGAAACTGTAATTTTCGGCAACAG | 4137              |
| <i>ccp</i>                                             | TCTCTGGCGCTGGATTAAGATAACG           | ATTAGGATTTTATCCTTTTGAAGA              | 1549              |
| Analysis of mutation of respiratory chain enzyme genes |                                     |                                       |                   |
| <i>ndh</i>                                             | GCTTGGAAGAGAATAGAGGTTTCAA           | CTACAAAAGTCTTCTGCGTCAAATA             | 1376              |
| <i>cydA</i>                                            | TCCTAATATTATCGACGGAGCCATTTCT        | GCCAATATTCTGTTGCAGTCATTGTCAG          | 1787              |
| <i>cydB</i>                                            | CCTTTCCGGTAAACGGAGTTAACTGACA        | TAATCTGAAACGCTGAAACCACTTCATC          | 1079              |
| <i>ccp</i>                                             | TCTCTGGCGCTGGATTAAGATAACG           | ATTAGGATTTTATCCTTTTGAAGA              | 1549              |
