# Supplementary material
Source: PubMed Central journal article supplement (PMC3406159)
Supplement: AEM.00733-12_zam999103515so5.pdf [file AEM.00733-12_zam999103515so5.pdf]

## Supplemental Material

Table S3. Oligonucleotides used for qPCR.

| Gene        | Forward primer sequence | Reverse primer sequence | Product size (bp) |
|-------------|-------------------------|-------------------------|-------------------|
| <i>ndh</i>  | AATACGCCAGGTGTAAGAGA    | CTGACTGGTTTTTCCATACC    | 140               |
| <i>cydA</i> | TGAAATCCTGTTCGGTATTC    | TGGAACCTTACCATTCAGAC    | 112               |
| <i>cydB</i> | CGATGTGATGATGAATACCA    | GGCAAATCACAGAATAAGC     | 127               |
| <i>ccp</i>  | TAAAGATCTGGGTTGTGCTT    | CACTTGGGTGACCTCTTTTA    | 110               |
| <i>adhA</i> | CTTCTCTGAAAGTCGGTGAC    | GTATAACCGGCATTTTCAAC    | 121               |
