# Supplementary material
Source: PubMed Central journal article supplement (PMC3406159)
Supplement: AEM.00733-12_zam999103515so6.pdf [file AEM.00733-12_zam999103515so6.pdf]

## Supplemental Material

Table S4. Activities of respiratory chain enzymes in complemented RDM strains under aerobic condition.

| Enzymes            | Activity [mU (mg protein) <sup>-1</sup> ] |       |                   |       |                  |       |                  |       |                   |              |                  |
|--------------------|-------------------------------------------|-------|-------------------|-------|------------------|-------|------------------|-------|-------------------|--------------|------------------|
|                    | wt                                        | RDM-4 |                   | RDM-5 |                  | RDM-8 |                  | RDM-9 |                   | RDM-11       |                  |
|                    | pZA22                                     | pZA22 | pZANDH            | pZA22 | pZANDH           | pZA22 | pZANDH           | pZA22 | pZANDH            | pZA22        | pZANDH           |
| NADH dehydrogenase | 56054<br>(±2615)                          | N.D.  | 102042<br>(±4852) | N.D.  | 88722<br>(±3952) | N.D.  | 89252<br>(±4851) | N.D.  | 125542<br>(±1963) | 222<br>(±13) | 86523<br>(±2356) |

  

| Enzymes                                      | Activity [mU (mg protein) <sup>-1</sup> ] |              |                |              |                |              |                |              |                |              |                |
|----------------------------------------------|-------------------------------------------|--------------|----------------|--------------|----------------|--------------|----------------|--------------|----------------|--------------|----------------|
|                                              | wt                                        | RDM-1        |                | RDM-2        |                | RDM-3        |                | RDM-6        |                | RDM-7        |                |
|                                              | pZA22                                     | pZA22        | pZACYD         |
| Cytochrome <i>bd</i> -type ubiquinol oxidase | 2002<br>(±162)                            | 203<br>(±32) | 3126<br>(±232) | 256<br>(±43) | 2006<br>(±198) | 202<br>(±89) | 2956<br>(±289) | 156<br>(±34) | 3256<br>(±359) | 269<br>(±71) | 2869<br>(±365) |

  

| Enzymes                        | Activity [mU (mg protein) <sup>-1</sup> ] |              |              |
|--------------------------------|-------------------------------------------|--------------|--------------|
|                                | wt                                        | RDM-10       |              |
|                                | pZA22                                     | pZA22        | pZACCP       |
| Cytochrome <i>c</i> peroxidase | 222<br>(±32)                              | 39<br>(±6.8) | 369<br>(±26) |

Data are means ± SEM.

N.D. represent not detected.
